# Supplementary material
Source: PubMed Central journal article supplement (PMC4858494)
Supplement: CJN.11641115SupplementaryData.pdf [file CJN.11641115SupplementaryData.pdf]

Supplemental Figure 1

| ABDR MM   | 0        | 1         | 2          | 3         | 4         | 5          | 6         |
|-----------|----------|-----------|------------|-----------|-----------|------------|-----------|
| 0 DQ MM   | 26 (8.1) | 37 (11.5) | 102 (31.8) | 55 (17.1) | 41 (12.8) | 38 (11.8)  | 22 (6.9)  |
| 1-2 DQ MM | 2 (0.4)  | 11 (2.4)  | 55 (11.8)  | 91 (19.5) | 93 (19.9) | 128 (27.4) | 87 (18.6) |

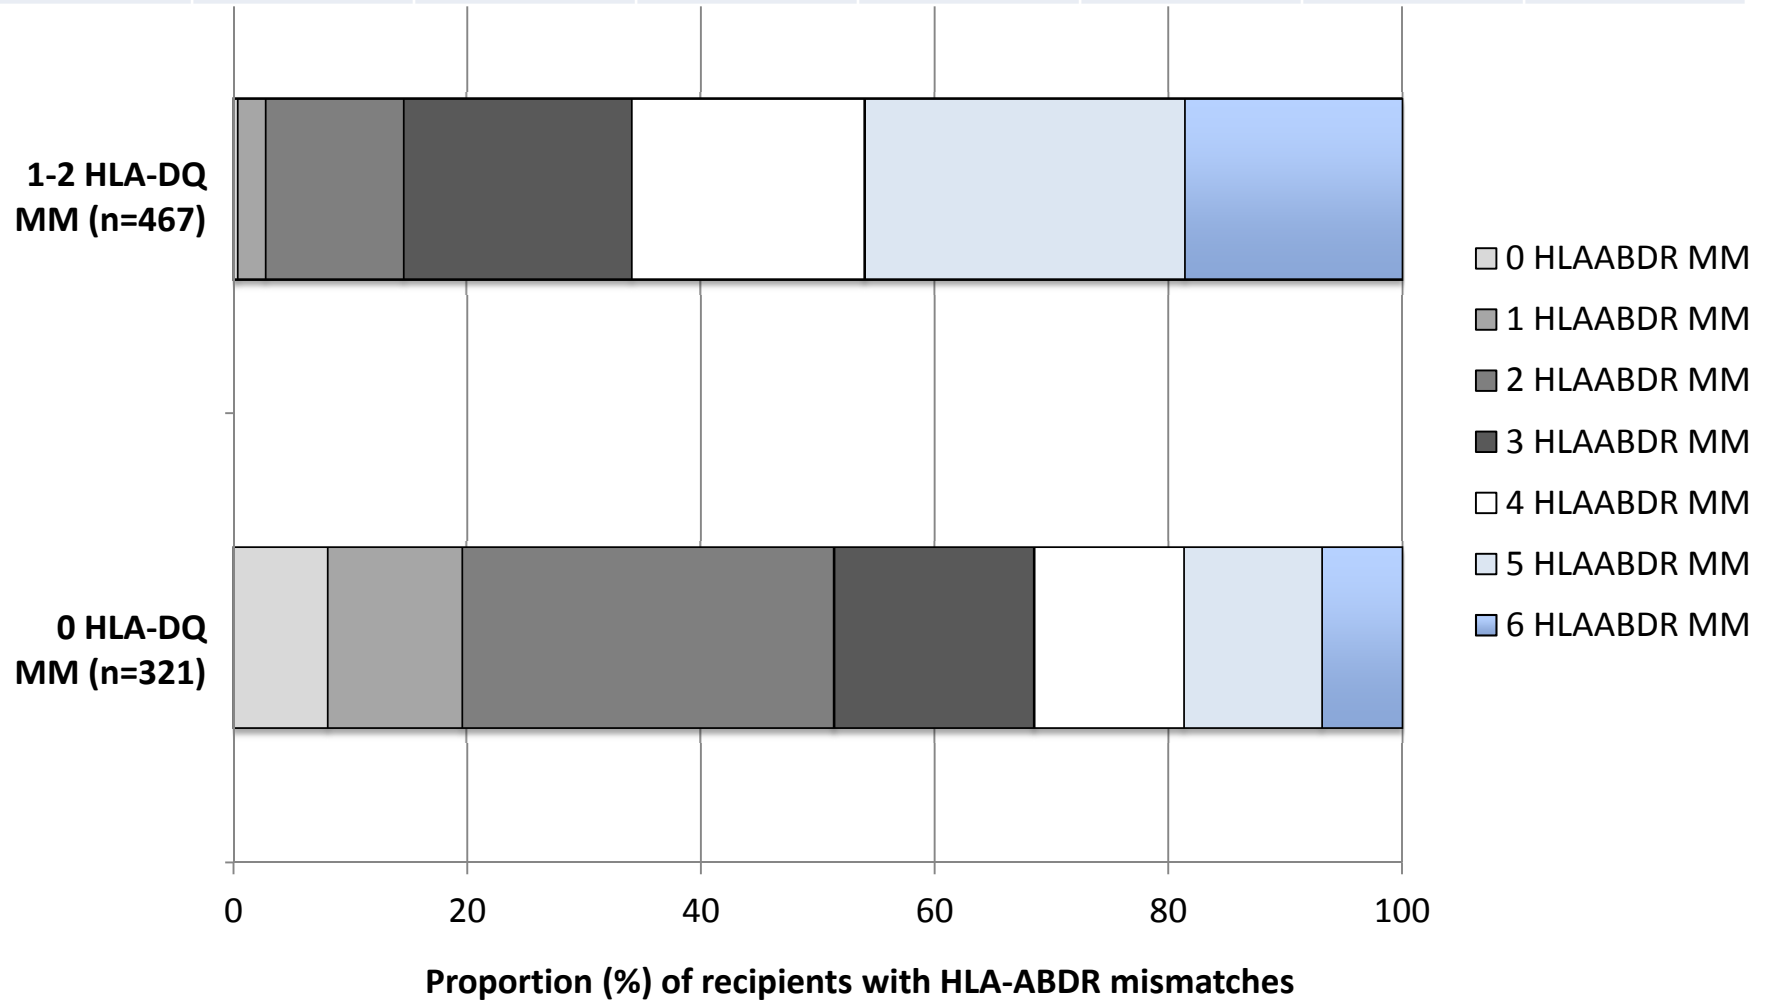

Proportions of kidney transplant recipients with 0 and 1-2 HLA-DQ mismatches (MM) and number of HLA-A, -B, and -DR mismatches (0-6) are shown in the bar graph. Numerical table showing the absolute number (percentage) of recipients in each HLA-A, -B, and -DR mismatched categories are also shown.
